# Supplementary material
Source: HighWire-hosted journal article supplement (https://bmjopen.bmj.com/content/8/6/e021117)
Supplement: inline-supplementary-material-1 [file inline-supplementary-material-1.pdf]

## Appendix 1 TreatWELL intervention delivery plan and resources

### Phase 1 Prehabilitation

#### **a) Delivery mode:**

Face to face study consultation visit 1 (1 hour) (hospital/research centre). All participants were encouraged to bring a support friend/family member

#### **Consultation Focus:**

Getting fit for surgery

- Education and endorsement on smoking, alcohol, physical activity, fruit and vegetables (FAV))

#### **Resources:**

- Fast track smoking cessation card
- Leaflet *How to stop smoking and stay stopped* booklet
- AUDIT alcohol assessment
- NHS Scotland alcohol booklet: *Making a Change*
- Macmillan DVD and booklet on physical activity
- DoH physical activity guidelines
- Pedometer

#### **Behaviour change techniques**

- Motivational Interviewing questions
- Goal setting for 2 health behaviours (smoking, alcohol, physical activity, diet, FAV)
- Implementation Intentions (smoking, alcohol, physical activity, FAV)
- Self-monitoring (activity diary)

AND Telephone home calls (1 to 2) 10-15 minutes (home)

### Phase 2 Surgical Recovery

#### **a) Delivery mode:**

Brief face to face support meeting (10- 15 min; in hospital ward)

#### **Consultation Focus:**

Recovery and continuing support

- Consistent with Enhanced Recovery After Surgery protocol (ERAS)
- Support about relevant post-operative physical activity
- Education and endorsement about diet (regular meals, sugary drinks, FAV)
- Advice offered on smoking and alcohol as appropriate

#### **Resources:**

- Bowel Cancer UK booklets: *Eating and Drinking During Treatment*, *Fibre after Bowel Cancer* (as appropriate),
- Phase 2 activity diary

#### **Behaviour change techniques**

### Phase 2 (early phase 3)

#### **b) Delivery mode:**

Brief telephone/ward contacts 10-15 minutes

#### **Consultation Focus:**

Recovery and continuing support

- 1<sup>st</sup> visit/call Supportive for managing goals
- 2<sup>nd</sup> visit/call Responding to queries about diet, physical activity, alcohol, smoking

Phase-3 Post surgical/adjuvant therapy/ recovery

**a) Delivery mode:**

Face to face consultation study visit 2 (1 hour; hospital/ research centre)

| <b>Participants not on chemotherapy</b>                                                                                                                                                                                                                                                                                                                                                                                                                                                                                                                                                                                                                                                                                                                                                                                                                                                                 | <b>Participants on Chemotherapy</b>                                                                                                                                                                                                                                                                                                                                                                                                                                                                                                                                                                                                                                                  |
|---------------------------------------------------------------------------------------------------------------------------------------------------------------------------------------------------------------------------------------------------------------------------------------------------------------------------------------------------------------------------------------------------------------------------------------------------------------------------------------------------------------------------------------------------------------------------------------------------------------------------------------------------------------------------------------------------------------------------------------------------------------------------------------------------------------------------------------------------------------------------------------------------------|--------------------------------------------------------------------------------------------------------------------------------------------------------------------------------------------------------------------------------------------------------------------------------------------------------------------------------------------------------------------------------------------------------------------------------------------------------------------------------------------------------------------------------------------------------------------------------------------------------------------------------------------------------------------------------------|
| Visit takes place start of phase 3                                                                                                                                                                                                                                                                                                                                                                                                                                                                                                                                                                                                                                                                                                                                                                                                                                                                      | Visit takes place half way through chemotherapy                                                                                                                                                                                                                                                                                                                                                                                                                                                                                                                                                                                                                                      |
| <b>Consultation Focus:</b><br>A new start <ul style="list-style-type: none"><li>• Diet, Keep active (walk and talk),</li><li>• Management of weight</li></ul> <b>Resources:</b> <ul style="list-style-type: none"><li>• Eatwell plate</li><li>• 7 day food and drink diary</li><li>• Booklet: <i>Thinking about becoming more active?</i></li><li>• 12 week activity diary</li><li>• Resistance bands</li><li>• NHS Tayside information <i>Helping you manage your weight</i></li><li>• Information about personalised weight management</li><li>• Bowel Cancer UK booklet: <i>Losing Weight Safely</i></li><li>• Weight awareness plan</li></ul> <b>Behaviour Change techniques</b> <ul style="list-style-type: none"><li>• Goal setting for two health behaviours physical activity, smoking, alcohol, diet</li><li>• Implementation intentions</li><li>• Self-monitoring (body weight log)</li></ul> | <b>Consultation Focus</b><br>A new start <ul style="list-style-type: none"><li>• Diet, Keep active (walk and talk),</li><li>• Introduce weight management concepts</li></ul> <b>Resources:</b> <ul style="list-style-type: none"><li>• Eatwell plate</li><li>• 7 day food and drink diary</li><li>• Booklet: <i>Thinking about becoming more active?</i></li><li>• 12 week activity diary</li><li>• Resistance bands</li></ul> <b>Behaviour Change techniques</b> <ul style="list-style-type: none"><li>• Goal setting for two health behaviours physical activity, smoking, alcohol, diet</li><li>• Implementation intentions</li><li>• Self-monitoring (body weight log)</li></ul> |

Face to face consultation study visit 3 (1 hour; hospital/research centre)

| <b>Participants with no chemotherapy</b>                                                                                                                                                                                                                                                                                                                                                                                          | <b>Chemotherapy</b>                                                                                                                                                                                                                                                                                                                                                                                                                                                                                                                                                                                                                                                                               |
|-----------------------------------------------------------------------------------------------------------------------------------------------------------------------------------------------------------------------------------------------------------------------------------------------------------------------------------------------------------------------------------------------------------------------------------|---------------------------------------------------------------------------------------------------------------------------------------------------------------------------------------------------------------------------------------------------------------------------------------------------------------------------------------------------------------------------------------------------------------------------------------------------------------------------------------------------------------------------------------------------------------------------------------------------------------------------------------------------------------------------------------------------|
| Scheduled 4 weeks post consultation study visit 2                                                                                                                                                                                                                                                                                                                                                                                 | Visit takes place at end of chemotherapy                                                                                                                                                                                                                                                                                                                                                                                                                                                                                                                                                                                                                                                          |
| <b>Consultation Focus:</b> <ul style="list-style-type: none"><li>• “Future planning”</li><li>• Education and endorsement on healthy eating,</li><li>• Reinforce physical activity advice</li></ul> <b>Resources:</b> <ul style="list-style-type: none"><li>• <i>TREATWELL Getting active and eating well after Bowel Cancer treatment</i></li><li>• Calories and alcohol information</li></ul> <b>Behaviour Change techniques</b> | <b>Consultation Focus:</b> <ul style="list-style-type: none"><li>• “Future planning”</li><li>• Management of weight</li><li>• Education and endorsement on healthy eating</li><li>• Reinforce physical activity advice</li></ul> <b>Resources:</b> <ul style="list-style-type: none"><li>• NHS Tayside information <i>Helping you manage your weight</i></li><li>• Information about personalised weight management</li><li>• Bowel Cancer UK booklet: <i>Losing Weight Safely</i></li><li>• Weight awareness plan</li><li>• <i>TREATWELL Getting active and eating well after Bowel Cancer treatment</i></li><li>• Calories and alcohol information</li></ul> <b>Behaviour Change techniques</b> |

And up to 8 Brief telephone calls 10-15 minutes at home
